# Supplementary material for: NQO1-induced activation of AMPK contributes to cancer cell death by oxygen-glucose deprivation
Source: PubMed Central journal article supplement (PMC4293602; doi:10.1038/srep07769), 2015-01-14
Supplement: srep07769-s1.pdf [file srep07769-s1.pdf]

## **SUBJECT AREAS: CANCER**

### **NQO1-induced activation of AMPK contributes to cancer cell death by oxygen-glucose deprivation**

Hyemi Lee<sup>1,7</sup>, Eun-Taex Oh<sup>1,2,7</sup>, Bo-Hwa Choi<sup>1,3,7</sup>, Moon-Taek Park<sup>1,4</sup>, Ja-Kyeong Lee<sup>2,5</sup>, Jae-Seon Lee<sup>2,6</sup> and Heon Joo Park<sup>1,2,\*</sup>

<sup>1</sup>Department of Microbiology, Inha Research Institute for Medical Sciences, College of Medicine, Inha University, Incheon, Korea, <sup>2</sup>Hypoxia-related Disease Research Center, College of Medicine, Inha University, Incheon, Korea, <sup>3</sup>Pohang Center for Evaluation of Biomaterials, Pohang Technopark, Pohang, Gyeongbuk, Korea, <sup>4</sup>Research Center, Dongnam Institute of Radiological & Medical Sciences (DIRAMS), Busan, Korea, <sup>5</sup>Department of Anatomy, College of Medicine, Inha University, Incheon, Korea, <sup>6</sup>Department of Biomedical Sciences, College of Medicine, Inha University, Incheon, Korea.

\*Correspondence and requests for materials should be addressed to H.P. ([park001@inha.ac.kr](mailto:park001@inha.ac.kr))

<sup>7</sup>These authors contributed equally

Figure S1.

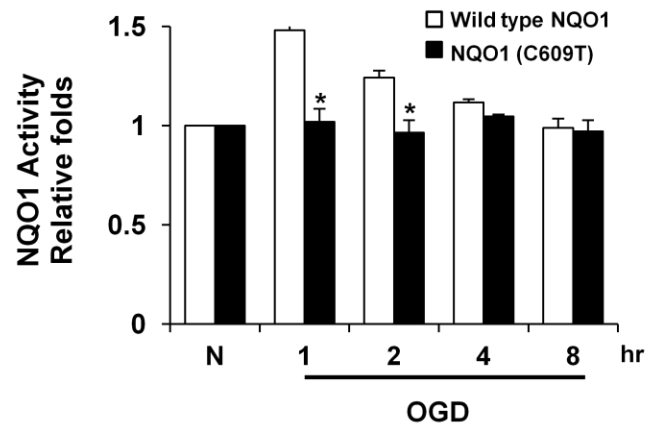

Figure S2.

A

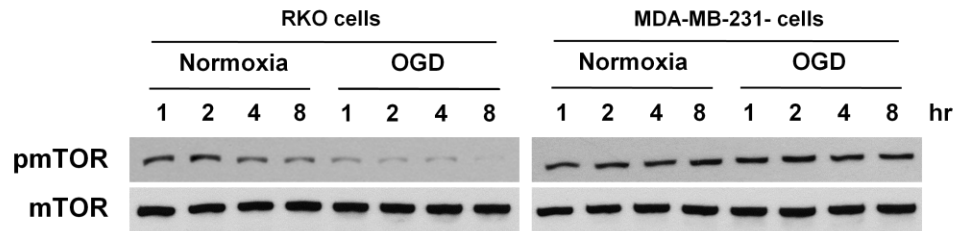

B

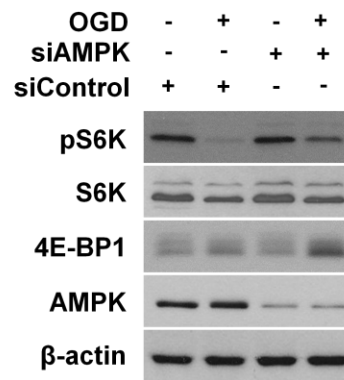

Figure S3.

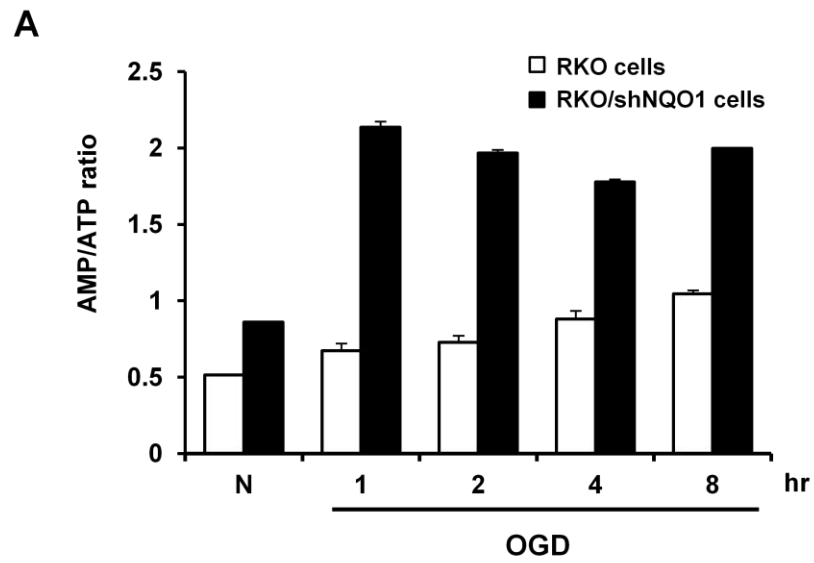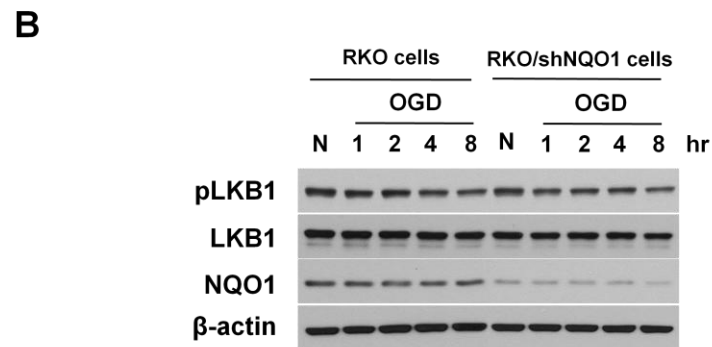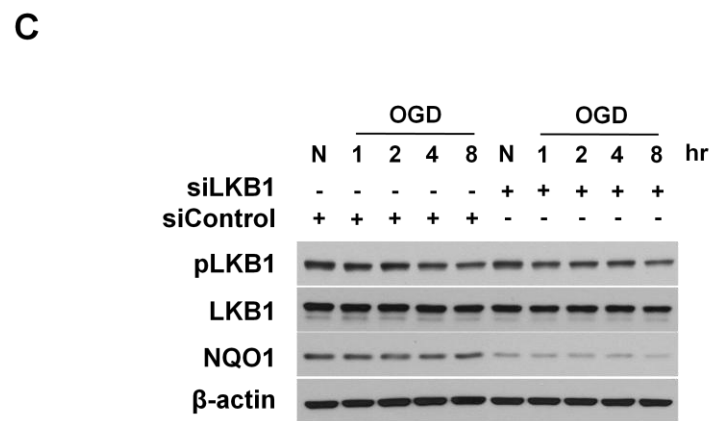

Figure S4.

A

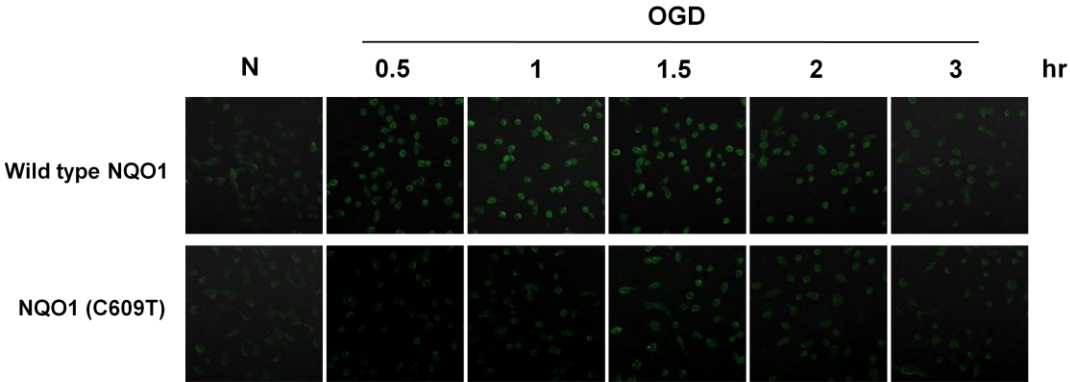

B

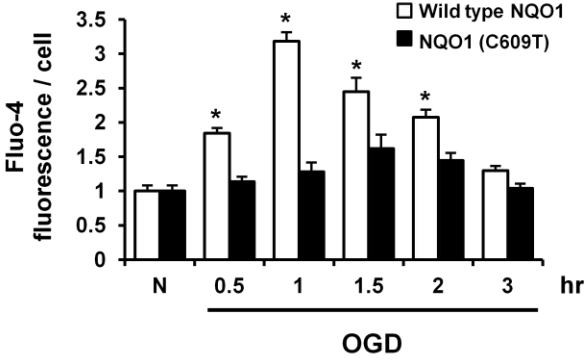

Figure S5.

A

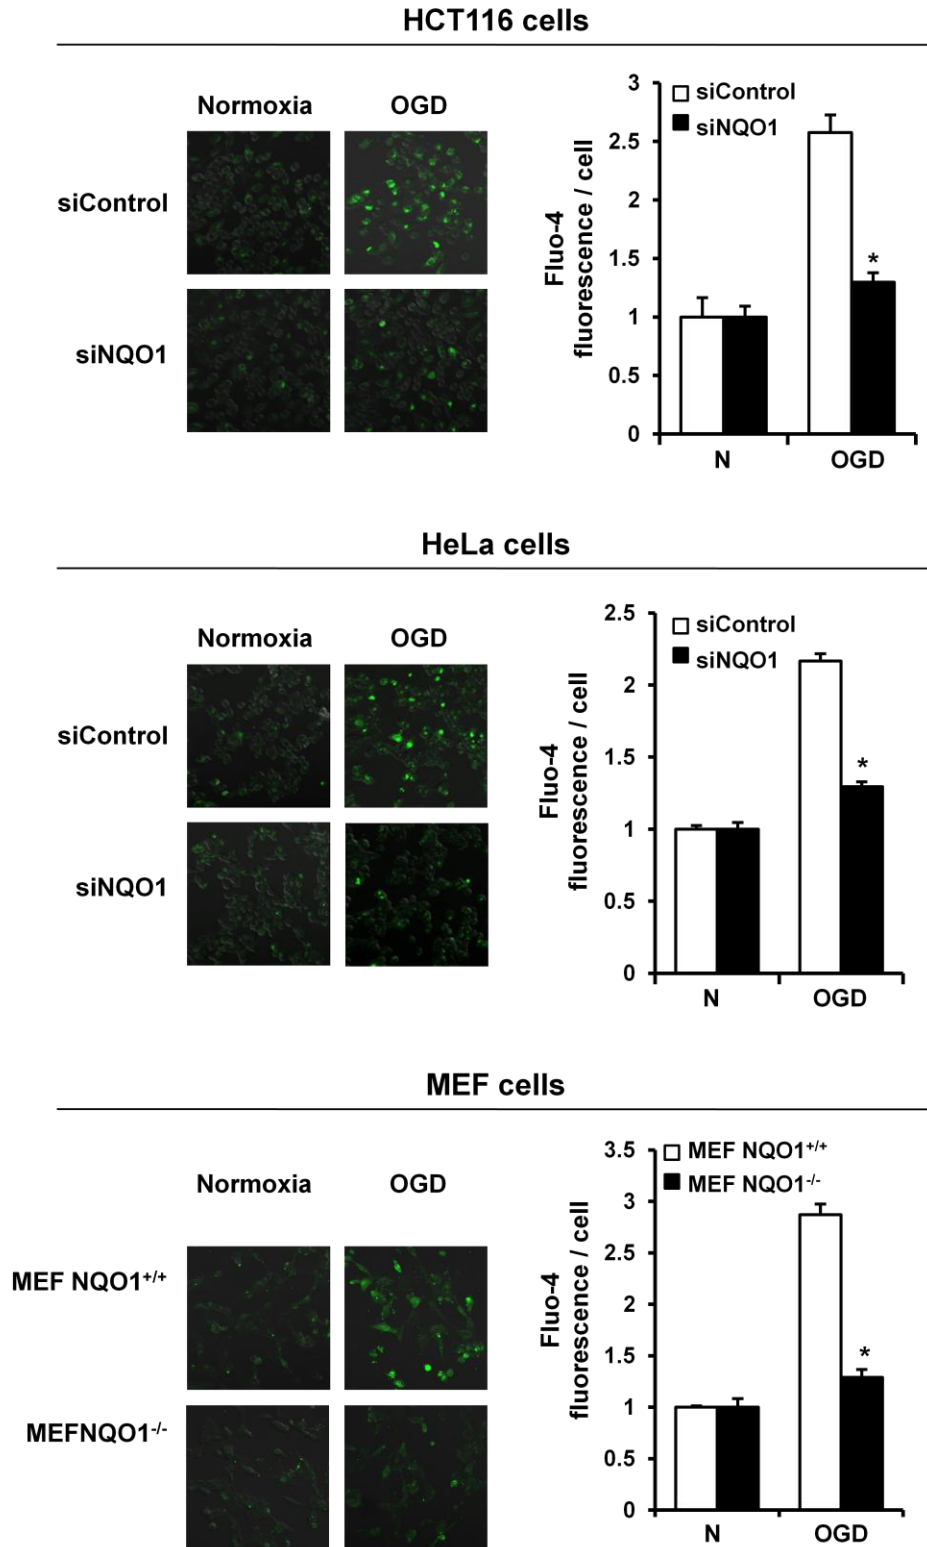

Figure S5. continued

**B**

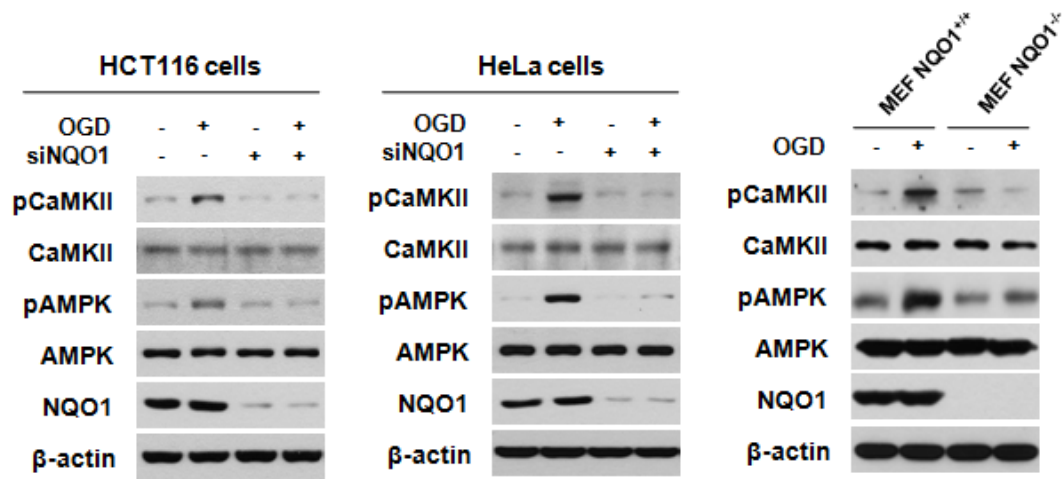

**C**

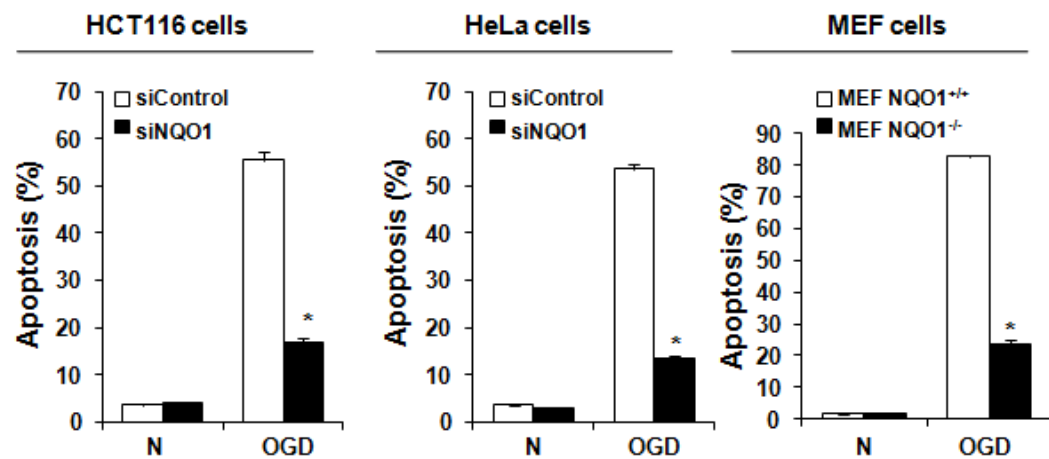

## Supplementary figure caption

### Figure S1

Activities of wild-type and mutant (C609T) NQO1 under OGD. MDA-MB231-/pNQO1 and MDA-MB231-/pNQO1 (C609T) cells were exposed to OGD for the indicated times, and NQO1 activity was assessed. The results from three independent experiments are expressed as means  $\pm$  SEM (\*,  $P < 0.05$ ).

### Figure S2

Involvement of NQO1 in OGD-induced AMPK/mTOR signaling. (A) Expression levels of pmTOR and mTOR in parental RKO and MDA-MB-231- cells exposed to OGD for the indicated times. (B) RKO cells transfected with siRNAs against AMPK were exposed to OGD for 8 h, and the phosphorylation levels of S6K, S6K, 4E-BP1 and AMPK in whole-cell lysates were determined by immunoblotting.

### Figure S3

OGD does not act through LKB1 to activate AMPK. (A) Intracellular [AMP]/[ATP] ratios in RKO and RKO/shNQO1 cells exposed to OGD for the indicated times. (B) Expression of pLKB, LKB, and NQO1 in RKO and RKO/shNQO1 cells exposed to OGD for the indicated times. (C) Effect of LKB1 knockdown on the expression levels of pAMPK and pACC in RKO cells. Abbreviation: N, normoxic control.

### Figure S4

Effect of OGD on  $[Ca^{2+}]_i$  in MDA-MB231-/pNQO1 and MDAMB231-/pNQO1 (C609T) cells (A)-(B) Fluo-4-AM-loaded cells were exposed to OGD for the indicated times. Representative fluorescence microscopic images (A) and quantification of  $[Ca^{2+}]_i$  (B) are shown. The results from three independent experiments are expressed as means  $\pm$  SEM (\*,  $P < 0.05$ ). Abbreviation: N, normoxic control.

### Figure S5

Effect of NQO1 on OGD-induced activation of CaMKII/AMPK signaling pathway via increase of  $[Ca^{2+}]_i$  and cancer cell death in various cell lines. (A) Fluo-4-AM-loaded cells were exposed to OGD for 1 h. Representative fluorescence microscopic images and quantification of  $[Ca^{2+}]_i$  are shown. The results from three independent experiments are expressed as means  $\pm$  SEM (\*,  $P < 0.05$ ). (B) The cells were exposed to OGD for 1 h, and whole-cell lysates were analyzed by immunoblotting using antibodies against pCaMKII, pAMPK, CaMKII and AMPK. (C) Role of NQO1 in OGD-induced apoptosis. The cells were exposed to OGD for 48 h, and the apoptotic cells were analyzed using flow cytometry. The results from three independent experiments are expressed as means  $\pm$  SEM (\*,  $P < 0.05$ ). Abbreviation: N, normoxic control.
